# Supplementary material for: Identification of Pre-frailty Sub-Phenotypes in Elderly Using Metabolomics
Source: Front Physiol. 2019 Jan 24;9:1903. doi: 10.3389/fphys.2018.01903 (PMC6353829; doi:10.3389/fphys.2018.01903)
Supplement: Supplementary file 1 [file Table_1.DOCX]

Supplementary Material

**Identification of pre-frailty sub-phenotypes in elderly using metabolomics**

**Estelle Pujos-Guillot1,2, Mélanie Pétéra2, Jérémie Jacquemin2, Delphine Centeno2, Bernard Lyan2, Ivan Montoliu3, Dawid Madej4, Barbara Pietruszka4,Cristina Fabbri5, Aurelia Santoro5,6, Anna Brzozowska4, Claudio Franceschi7, Blandine Comte1***

* **Correspondence**: Blandine Comte; blandine.comte@inra.fr

# Supplementary Tables

**Table 1S:** Summary of identifications of serum metabolites.

1Identified compounds confirmed with authentic standards (level 1, (Sumner et al., 2007)), 2Putatively annotated compounds (level 2, (Sumner et al., 2007)), 3Putatively characterized compound (level 3, (Sumner et al., 2007)).

| **Metabolic Pathway** | **Name** | **Variable label** | **Annotation** | **Retention time (min)** | **Measured mass (*m*/*z*)** |
| --- | --- | --- | --- | --- | --- |
| Amino acid metabolism | Glutamine1 | M151T50 | [M+Na-H2O]+ | 0.83 | 151.04774 |
| 2,4 diaminobutyric acid1 | M101T50 | [M+H-H2O]+ | 0.84 | 101.07092 |
| Threonine1 | M120T51 | [M+H]+ | 0.85 | 120.06543 |
|  | M74T51 | [M+H-CH2O2]+ | 0.85 | 74.06007 |
| Phenylalanine1 | M131T359 | [M+H-H2O-NH3]+ | 5.99 | 131.04920 |
| Pipecolic acid2 | M130T70 | [M+H]+ | 1.16 | 130.08639 |
| Proline1 | M116T57 | [M+H]+ | 0.95 | 116.0703 |
| Amino-octanoic acid3 | M160T491 | C8H18O2N+ | 8.19 | 160.13318 |
| Glutamic acid1 | M130T50 | [M+H-H2O]+ | 0.84 | 130.04982 |
| Alanine1 | M90T51 | [M+H]+ | 0.84 | 90.05485 |
| Carbohydrate metabolism | Mannose1 | M198T53 | [M+NH4]+ | 0.88 | 198.09741 |
| Fructose1 | M383T52 | [2M+Na]+ | 0.87 | 383.11607 |
|  | M384T52 | 13C[2M+Na]+ | 0.87 | 384.11950 |
|  | M443T52 | [2M+2Na+K-2H]+ | 0.87 | 443.07214 |
| Lactose1 | M325T52 | [M+Na-NaOH]+ | 0.87 | 325.11298 |
| Deoxyglucose1 | M187T58 | [M+H]+ | 0.98 | 187.05772 |
| Lipid metabolism | Butyrylcarnitine1 | M232T412 | [M+H]+ | 6.87 | 232.15438 |
| Isovalerylcarnitine1 | M246T473 | [M+H]+ | 7.88 | 246.17003 |
| LysoPE(16:0)1 | M454T904 | [M+H]+ | 15.06 | 454.29240 |
| lysoPE(18:1)2 | M480T927 | [M+H]+ | 15.45 | 480.30998 |
| lysoPE(18:2)2 | M478T874 | [M+H]+ | 14.57 | 478.29360 |
| PG(26:1)3 | M636T625 | C32H61O10P+ | 10.41 | 636.39859 |
| Peptides | N-(2-Hydroxypropyl)-valine2 | M176T61 | [M+H]+ | 1.01 | 176.12791 |
| Gly-Phe1 | M223T435 | [M+H]+ | 7.26 | 223.10662 |
| Pyr-Glu-Ala3 | M351T58 | C13H20N4NaO6+ | 0.97 | 351.12618 |
| Food metabolites | Dimethyloxazole2 | M98T371 | [M+H]+ | 6.18 | 98.06028 |
| 2,3-dihydromethylpyrrole3 | M84T71 | C5H9N | 1.18 | 84.08110 |
| trigoneline1 | M138T56 | [M+H]+ | 0.94 | 138.05439 |
| Dihydroxyphenyl acetic acid3 | M169T41 | C8H8O4+ | 0.69 | 169.04605 |
| Unknown | Unknown | M146T41 | C3H8NO4Mg+ | 0.68 | 146.02986 |
| Unknown | M610T45 |  | 0.75 | 609.96090 |

**
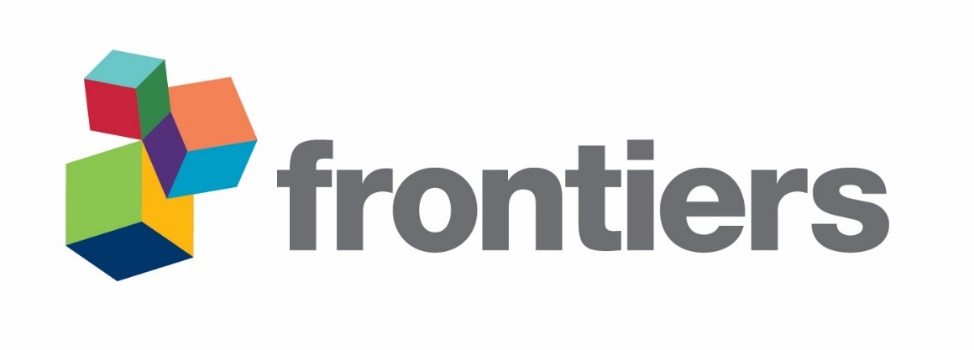
**
